# Supplementary material
Source: MDPI journal article supplement (https://www.mdpi.com/2073-4395/12/5/1149)
Supplement: s1 [file s1]

Table S1 Primers used in the present study

| Gene name          | Primer sequence (5'-3')  |                        |
|--------------------|--------------------------|------------------------|
|                    | Forward                  | Reverse                |
| <i>ZmActin</i>     | GTTTCCTGGGATTGCCGAT      | TCTGCTGCTGAAAAGTGCTGAG |
| <i>Zmpsba</i>      | TCGCTGCTCCTCCAGTAGAT     | CGCATACCCAGACGGAAACT   |
| <i>Zmpsbd</i>      | TCTGGTTGGTTCTTCTCGCC     | AGGTATTTGCACCATCGCCA   |
| <i>Zmpsaa</i>      | TATTTGCTCGCAGTTCCCGT     | TACCCCAAACATCCGACTGC   |
| <i>Zmpsab</i>      | GCAGGGCAACGTTTCACAAT     | GCCAATATCCACGCCAGGAA   |
| <i>ZmpetA</i>      | GAAACCGAGGAAGGGGACAG     | TTCTGGCCCCGGGAGGTATAA  |
| <i>ZmpetB</i>      | TATACGGTTCTCGGAGGGGG     | AAAGCCTCTGTAACGGTCGG   |
| <i>ZmPEPC 1</i>    | TCCTCCAAACGAGCCCTAC      | AAACTCCAGAAGCCAGCAGA   |
| <i>ZmRubisco 2</i> | AAGACGTTTCAGACAGACATTCAG | TATTAGTTCCTGCTCCTTCACC |
| <i>ZmNADP-MDH</i>  | TTCTTGACTTCACTGGACCCT    | ATTGTAGACACCCTTCTGCTTC |
| <i>ZmNADP-ME 2</i> | TGGTTGGTGGACTCAAAGGT     | TACAAGGTTGTCAAGGGCTCA  |
| <i>ZmPPDK 1</i>    | CTGTGAAGTAGGGGTCCAAGG    | CAAGGTGTACCAGAACGCAAA  |
